# Supplementary material for: Human and Environmental Impacts on River Sediment Microbial Communities
Source: PLoS One. 2014 May 19;9(5):e97435. doi: 10.1371/journal.pone.0097435 (PMC4026135; doi:10.1371/journal.pone.0097435)
Supplement: Table S1 — Sampling location coordinates, and distances between sites along the path of the river. (XLSX) [file pone.0097435.s004.xlsx]

## Sheet: Sheet1
site	latitudea	longitudea	distanceb
Bridge (B)	45.9429	106.949	0
Campground (C)	45.1391	106.768	35
Big Game (BG)	45.1834	106.74	42
White Birney (W)	45.3228	106.515	75
Elk Shoulder (E)	45.4143	106.441	89
Sitting Man (S)	45.6525	106.29	134
a decimal degrees
b kilometers
