# Supplementary material for: Human and Environmental Impacts on River Sediment Microbial Communities
Source: PLoS One. 2014 May 19;9(5):e97435. doi: 10.1371/journal.pone.0097435 (PMC4026135; doi:10.1371/journal.pone.0097435)
Supplement: Table S2 — Metagenomes sequenced for this study, showing MG-RAST identifier, site, season, and replicate information. The bold MG-RAST IDs show the deeply sequenced samples (∼60 million reads per sample; compared to ∼20 million sequences for the other samples). (XLSX) [file pone.0097435.s005.xlsx]

## Sheet: Sheet1
MG-RAST ID	site	Season/Year	replicate
4.48197e+06	BG	spring/2011	a
4.48197e+06	BG	spring/2011	b
4.48199e+06	BG	fall/2010	a
4.48199e+06	BG	fall/2010	b
4.48197e+06	BG	spring/2011	a
4.48197e+06	BG	spring/2011	b
4.48198e+06	B	fall/2010	a
4.48198e+06	B	fall/2010	b
4.48198e+06	B	fall/2010	c
4.48198e+06	B	fall/2010	d
4.48198e+06	C	fall/2010	a
4.48198e+06	C	fall/2010	b
4.48196e+06	C	spring/2011	a
4.48196e+06	C	spring/2011	b
4.48197e+06	C	spring/2011	c
4.48197e+06	C	spring/2011	d
4.48198e+06	E	spring/2011	a
4.48198e+06	E	spring/2011	b
4.48196e+06	S	spring/2011	a
4.48196e+06	S	spring/2011	b
4.48197e+06	W	spring/2011	a
4.48197e+06	W	spring/2011	b
4.48197e+06	W	spring/2011	c
4.48198e+06	W	fall/2010	a
4.48198e+06	W	fall/2010	b
