# Supplementary material for: Human and Environmental Impacts on River Sediment Microbial Communities
Source: PLoS One. 2014 May 19;9(5):e97435. doi: 10.1371/journal.pone.0097435 (PMC4026135; doi:10.1371/journal.pone.0097435)
Supplement: Table S3 — Environmental metadata for Tongue River samples. (XLSX) [file pone.0097435.s006.xlsx]

## Sheet: Sheet1
site	year	season	temperaturea	pH	conductivityb	DOc	salinityd
B	2010	fall	nae	na	na	na	na
	2011	spring	na	na	na	na	na
	2011	fall	10.9	8.3	385.7	85.5	0.3
	2012	spring	9.9	9.1	274	90.2	0.2
C	2010	fall	10.5	8.7	404	93.6	0.3
	2011	spring	5	8.2	691.5	98.5	0.3
	2011	fall	16.1	9	445	98	0.3
	2012	spring	6.3	8.4	481	95.3	0.4
BG	2010	fall	na	na	na	na	na
	2011	spring	9.8	8.7	679.5	146.2	0.3
	2011	fall	15.7	9.4	438.1	116	0.3
	2012	spring	10.4	9	540.5	112.5	0.4
W	2010	fall	6.2	8.6	586	86.8	0.3
	2011	spring	5.7	8.8	872	95.4	0.4
	2011	fall	9.2	9.2	414.5	85.8	0.3
	2012	spring	10.3	9.4	595.5	81.9	0.4
S	2010	fall	na	na	na	na	na
	2011	spring	7.1	8.7	1025	86.5	0.5
	2011	fall	10.3	9.1	566	93	0.4
	2012	spring	13.2	9.5	756.5	92.8	0.5
E	2010	fall	6.2	8.5	597	86.9	0.3
	2011	spring	na	na	na	na	na
	2011	fall	9.3	9.1	432.4	90.6	0.3
	2012	spring	11.1	9.4	612.5	96.2	0.4
a ° C
b µS cm-1
c % dissolved oxygen saturation
d parts per thousand (ppt)
e sample metadata not available due to the death of a co-author
