# Supplementary material for: Human and Environmental Impacts on River Sediment Microbial Communities
Source: PLoS One. 2014 May 19;9(5):e97435. doi: 10.1371/journal.pone.0097435 (PMC4026135; doi:10.1371/journal.pone.0097435)
Supplement: Table S4 — Average relative abundance of 37 functional groups (SEED Subsystems L3) that differed significantly between sites. (XLSX) [file pone.0097435.s007.xlsx]

## Sheet: Sheet1
	B	C	BG	W	E	S
RNA polymerase archaeal	2.57e-05	4.81e-06	8.56e-06	3.21e-06	0.00074	1.12e-05
Arginine Biosynthesis extended	0.00684	0.0064	0.00622	0.00679	0	0.00774
Staphylococcal phi-Mu50B-like prophages	0.00639	0.0054	0.00537	0.00602	0.0111	0.00762
CBSS-196164.1.peg.1690	0.00637	0.00537	0.00534	0.00608	0.011	0.00757
Staphylococcal pathogenicity islands SaPI	0.0186	0.0169	0.0169	0.0187	0.0321	0.0225
GroEL GroES	0.0185	0.017	0.0169	0.0187	0.0321	0.0228
Coenzyme A Biosynthesis	0.0051	0.00469	0.00475	0.00485	0.00811	0.00564
Branched-Chain Amino Acid Biosynthesis	0.00505	0.00465	0.0047	0.0049	0.00799	0.00557
RNA polymerase bacterial	0.0436	0.039	0.039	0.0432	0.0677	0.0489
HMG CoA Synthesis	0.00556	0.0052	0.00509	0.00571	0.00915	0.00641
Thiamin biosynthesis	0.00612	0.00594	0.00573	0.00608	0.011	0.00707
Transcription factors bacterial	0.00831	0.00697	0.0072	0.00795	0.0134	0.00932
S12p Asp methylthiotransferase	0.00186	0.00164	0.00154	0.00172	0.00279	0.00225
Alkylphosphonate utilization	0.000287	0.000592	0.000578	0.000583	0.000337	0.000313
DNA-replication	0.00645	0.00578	0.00579	0.00655	0.0101	0.0073
COG2363	0.00619	0.006	0.00571	0.00617	0.0109	0.00711
Glyoxylate bypass	0.00454	0.00128	0.00516	0.00405	0	1.6e-06
Iron-sulfur cluster assembly	0.00686	0.00616	0.00599	0.00613	0.011	0.00757
DNA repair, bacterial	0.00648	0.00583	0.00578	0.00648	0.00996	0.00718
F0F1-type ATP synthase	0.018	0.0155	0.0157	0.0174	0.0279	0.0199
CinA and related protein families	0.00647	0.00574	0.00576	0.00641	0.00999	0.00709
tRNA modification Bacteria	0.0069	0.00626	0.00602	0.00605	0.0111	0.0076
Na+ translocating decarboxylases and related biotin-dependent enzymes	7.06e-05	5.35e-07	5.35e-07	1.54e-05	3.53e-05	5.61e-05
DNA repair, bacterial UmuCD system	0.00646	0.00586	0.00573	0.00646	0.00997	0.00714
CBSS-257314.1.peg.676	0.00644	0.00584	0.00578	0.00643	0.01	0.00712
DNA repair, bacterial RecFOR pathway	0.0064	0.00589	0.00575	0.00642	0.00996	0.00714
Protection from ROS	0.0128	0.011	0.0117	0.0129	0.0194	0.0129
Regulation of Oxidative Stress Response	0.0109	0.00901	0.00974	0.011	0.0162	0.0103
Histidine Degradation	0.00477	0.00448	0.0046	0.00508	0.00776	0.00539
Cysteine Biosynthesis	0.00326	0.00288	0.00275	0.00306	0.00465	0.00358
Photosystem II-type photosynthetic reaction center	0.000266	0.00017	0.000278	0.00028	6.58e-05	3.69e-05
Oxidative stress	0.0129	0.0109	0.0116	0.013	0.0191	0.0129
Phenol hydroxylase	0.000288	0.000217	0.000322	0.000289	0.000103	0.000103
Auxin biosynthesis	0.00739	0.00678	0.00672	0.00691	0.0104	0.00758
PABA, 3-hydroxyanthranilate	0.00738	0.00673	0.00673	0.00688	0.0104	0.00751
Leucine Degradation and HMG-CoA Metabolism	0.00612	0.00564	0.0053	0.00644	0.00914	0.0062
